1 **Title:** Symbiosis modulates gene expression of symbionts, but not hosts, under thermal challenge

2 **Running Head:** Coral holobiont gene expression

3 **Authors:** Hannah E Aichelman<sup>1\*</sup>, Alexa K Huzar<sup>1</sup>, Daniel M Wuitchik<sup>1</sup>, Kathryn F Atherton<sup>1</sup>,

4 Rachel M Wright<sup>1,+</sup>, Groves Dixon<sup>2</sup>, E Schlatter<sup>1</sup>, Nicole Haftel<sup>1</sup>, and Sarah W Davies<sup>1\*</sup>

5 **Institutional Affiliations:**

6 <sup>1</sup>Department of Biology, Boston University, Boston MA 02215

7 <sup>2</sup>Department of Integrative Biology, University of Texas at Austin, Austin, TX

8 <sup>+</sup>Current affiliation: Department of Biology, Southern Methodist University, Dallas TX

9 <sup>\*</sup>Co- corresponding authors (hannaaichelman@gmail.com; daviessw@gmail.com)

10 **Abstract**

11 Increasing ocean temperatures are causing dysbiosis between coral hosts and their symbionts.  
12 Previous work suggests that coral host gene expression responds more strongly to environmental  
13 stress compared to their intracellular symbionts; however, the causes and consequences of this  
14 phenomenon remain untested. We hypothesized that symbionts are less responsive because hosts  
15 modulate symbiont environments to buffer stress. To test this hypothesis, we leveraged the  
16 facultative symbiosis between the scleractinian coral *Oculina arbuscula* and its symbiont  
17 *Breviolum psygmophilum* to characterize gene expression responses of both symbiotic partners *in*  
18 *and ex hospite* under thermal challenges. To characterize host and *in hospite* symbiont responses,  
19 symbiotic and aposymbiotic *O. arbuscula* were exposed to three treatments: 1) control (18°C), 2)  
20 heat (32°C), and 3) cold (6°C). This experiment was replicated with *B. psygmophilum* cultured  
21 from *O. arbuscula* to characterize *ex hospite* symbiont responses. Both thermal challenges elicited  
22 classic environmental stress responses (ESRs) in *O. arbuscula* regardless of symbiotic state, with  
23 hosts responding more strongly to cold challenge. Hosts also exhibited stronger responses than *in*  
24 *hospite* symbionts. *In* and *ex hospite* *B. psygmophilum* both downregulated genes associated with  
25 photosynthesis under thermal challenge; however, *ex hospite* symbionts exhibited greater gene  
26 expression plasticity and differential expression of genes associated with ESRs. Taken together,  
27 these findings suggest that *O. arbuscula* hosts may buffer environments of *B. psygmophilum*  
28 symbionts; however, we outline the future work needed to confirm this hypothesis.

29

30 **Keywords:** thermal challenge, symbiosis, gene expression, coral

31

32

33

## 34 Introduction

35 Endosymbioses—associations where one organism lives within cells of its host [1]—have  
36 driven evolutionary innovations and allowed species to access resources and environments that  
37 would otherwise be unavailable [2, 3]. Endosymbioses span the tree of life and comprise  
38 exemplary innovations including deep-sea hydrothermal vent tubeworms (*Riftia pachyptila*) that  
39 rely on chemosynthetic bacterial endosymbionts [e.g., 4] and salamanders (*Ambystoma*  
40 *maculatum*) benefiting from photosynthetic endosymbionts (*Oophila amblystomatis*) as embryos  
41 [e.g., 5]. Endosymbionts often live within a host compartment, such as a vacuole or membrane,  
42 which facilitates the exchange of nutrients and metabolites, serving as the backbone for these  
43 symbioses [2, 6].

44 Corals are one of the most iconic examples of endosymbiosis, and their symbiosis with  
45 single celled algal symbionts [dinoflagellate algae in the family Symbiodiniaceae, hereafter  
46 ‘symbiont’, 7] enables diverse tropical reef ecosystems to thrive in oligotrophic waters [3].  
47 Symbiodiniaceae live in coral gastrodermal cells in specialized vacuoles called symbiosomes [2,  
48 8]. This endosymbiosis facilitates the transfer of materials between host and symbiont, where  
49 Symbiodiniaceae share photosynthetically-derived carbon sugars and in return receive inorganic  
50 compounds from coral metabolic waste in addition to protection [9, 10]. Once symbiosis is  
51 established, hosts can actively modulate symbiont physiology by manipulating the symbiosome  
52 environment. For example, symbiont photosynthesis is dependent on nitrogen availability, and  
53 host-mediated nitrogen limitation enables maintenance of primary production and control of  
54 symbiont growth [11, 12]. Additionally, coral hosts acidify the symbiosome *via* expression of V-  
55 type proton ATPases, which facilitates increased photosynthesis [13].

56           Tropical corals live near their upper thermal limits, making them particularly susceptible  
57 to temperature changes [14, 15]. Increases in anthropogenic carbon dioxide levels are elevating  
58 ocean temperatures and leading to marine heatwaves [*i.e.*, 16], which threaten corals globally [17].  
59 Specifically, temperature increases lead to a breakdown of coral-algal symbioses in a process  
60 called ‘coral bleaching’, and extended periods of dysbiosis can lead to coral starvation and eventual  
61 mortality [18]. It is theorized that reactive oxygen species (ROS) generated by algal symbionts  
62 under temperature stress can damage cellular components, cause photoinhibition, and trigger coral  
63 bleaching [reviewed in 19]. However, even though both symbiotic partners exhibit a wide array of  
64 stress responses, symbionts are assumed to initiate dysbiosis due to ROS production [*e.g.*, 20–22].  
65 Additionally, several lines of evidence demonstrate that hosts exhibit strong gene expression  
66 responses to stress [*e.g.*, 23–25, reviewed in 26], while the symbiont’s response is muted [*e.g.*, 27–  
67 29]. This paucity of an algal response suggests that corals may regulate their symbiont’s  
68 environment to buffer algae from stress; however, alternative explanations include that the  
69 symbiont’s transcriptomic machinery is less responsive to stress regardless of symbiotic state.

70           Understanding the independent and interactive roles of coral hosts and Symbiodiniaceae  
71 algae in holobiont (*i.e.*, assemblage of coral host and associated algal and microbial symbionts)  
72 resilience is difficult in a tropical coral system [reviewed in 30] because it is impossible to  
73 disentangle the host’s aposymbiotic state from stress and nutrient limitation given tropical coral  
74 reliance on Symbiodiniaceae-derived carbon. To address these difficulties, facultative symbioses  
75 have emerged as tractable systems for answering fundamental questions about coral symbiosis  
76 [31]. Here, we used gene expression profiling in the facultatively symbiotic coral *Oculina*  
77 *arbuscula* and its symbiont *Breviolum psygmophilum* to address two questions: 1) what is the  
78 consequence of symbiosis for coral hosts under thermal challenge? and 2) how does symbiosis

79 modulate symbiont responses to thermal challenges? We hypothesized that, compared to  
80 aposymbiotic corals, symbiotic corals under thermal challenge would exhibit gene expression  
81 patterns consistent with environmental stress responses (ESRs) of tropical corals because of  
82 symbiont-derived ROS produced under thermal stress. Based on previous work documenting  
83 minimal *in hospite* symbiont gene expression responses, we predicted greater responses of  
84 symbiotic hosts compared to symbionts *in hospite* and muted responses of symbionts *in hospite*  
85 compared to *ex hospite*, consistent with coral hosts modulating symbiont environments. To answer  
86 these questions, we conducted temperature challenge assays and characterized host and symbiont  
87 responses *via* gene expression profiling.

88

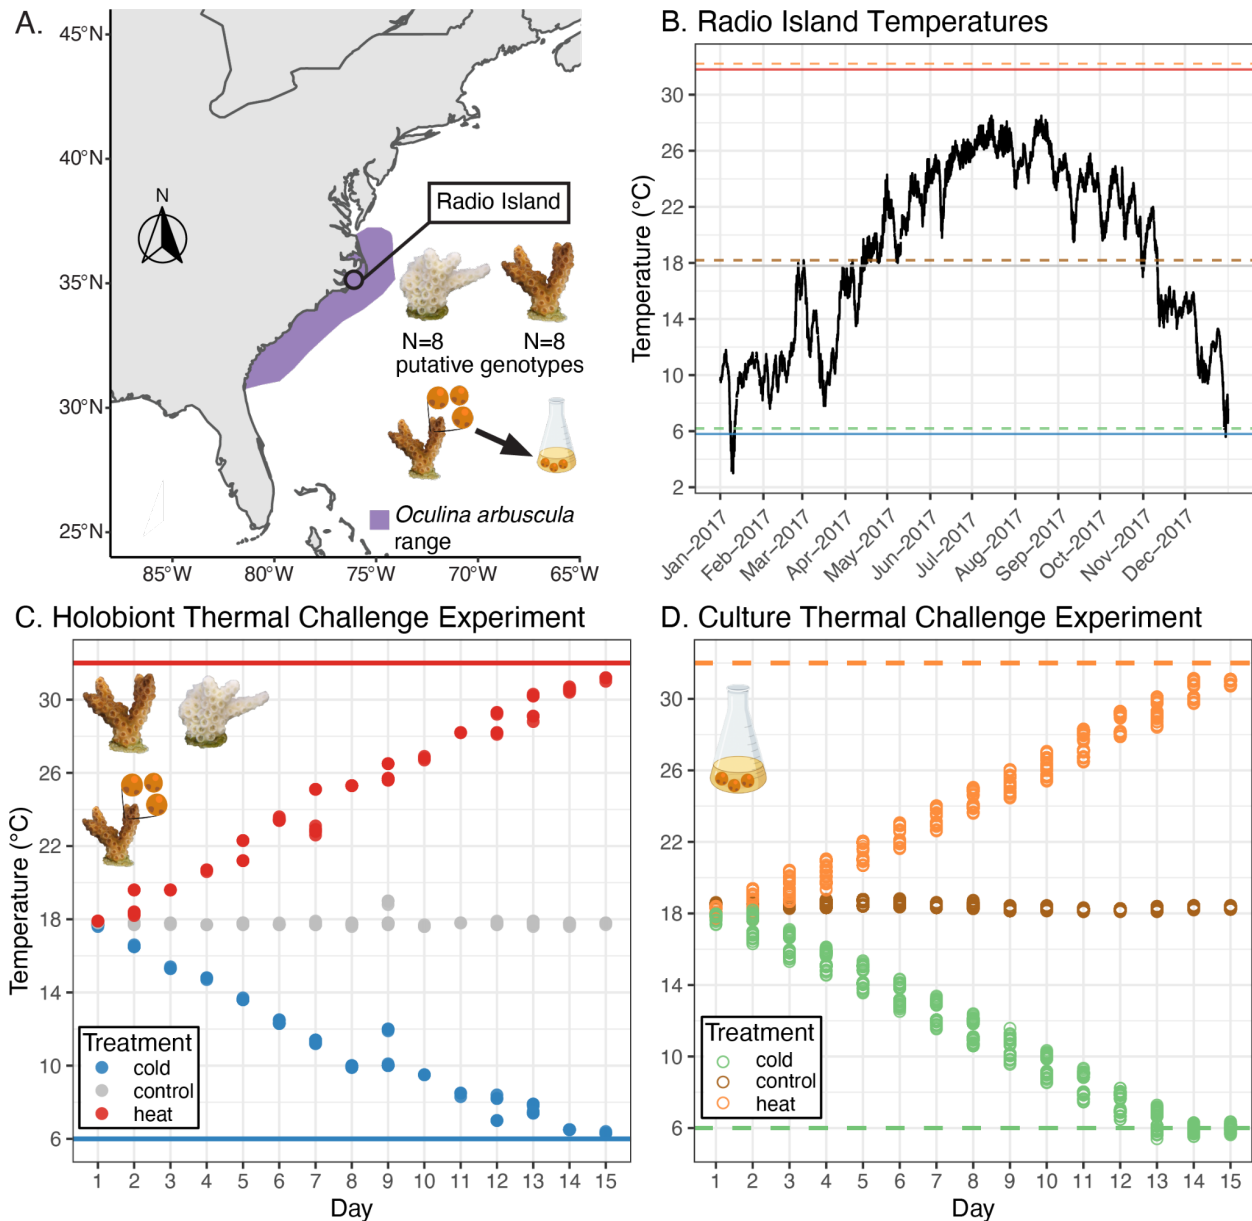

89

90 **Figure 1. Experimental overview.** **A.** Map of collection site (Radio Island, North Carolina) of  
 91 *Oculina arbuscula* used in the holobiont thermal challenge experiment (N=8/symbiotic state).  
 92 Purple shading indicates *O. arbuscula* range. **B.** Water temperatures (black line) in 2017 recorded  
 93 at the NOAA buoy near Radio Island with thermal challenge treatments (heat=32°C,  
 94 control=18°C, cold=6°C) overlaid. **C.** Temperatures recorded during holobiont thermal challenge  
 95 experiment. **D.** Temperatures recorded during culture thermal challenge experiment. Culture icons  
 96 were created with BioRender.com.

97

98

99

100

101

## 102 **Materials and Methods**

### 103 ***I. Experiment 1: Oculina arbuscula and Breviolum psygmophilum holobiont responses to*** 104 ***temperature challenges in symbiosis***

#### 105 *Coral Collection & Experimental Design*

106 In June 2018, 16 *O. arbuscula* colonies (N=8 symbiotic, N=8 aposymbiotic) were collected  
107 from Radio Island, North Carolina (NC) (34.712590°N, -76.684308°W) under NC Division of  
108 Marine Fisheries permits #706481 and #1627488 (Figure 1A). Colonies were shipped overnight  
109 to Boston University, fragmented, attached to petri dishes using cyanoacrylate glue, and  
110 maintained at ambient conditions (18°C, 33-35 PSU) for approximately 5 months. Experimental  
111 temperatures were informed by 2017 (January 1 - December 31, 2017) *in situ* temperature data  
112 recorded by the NOAA buoy closest to the collection site (Station BFTN7; minimum temperature  
113 recorded=3°C, maximum temperature recorded=28.5°C; Figure 1B). One fragment from each  
114 colony (N=48 fragments) was placed in one of three treatments: 1) control: 18°C, 2) heat  
115 challenge: temperature increased 1°C day<sup>-1</sup> from 18°C to 32°C, and 3) cold challenge: temperature  
116 decreased 1°C day<sup>-1</sup> from 18°C to 6°C. Treatments were maintained for 15 days using Aqua Logic  
117 digital temperature controllers calibrated with a NIST-certified glass thermometer and were  
118 recorded using HOBO loggers (Figure 1C).

119

#### 120 *In hospite symbiont physiology*

121 Pulse Amplitude Modulation (PAM) fluorometry measured dark-acclimated  
122 photochemical efficiency of photosystem II (Fv/Fm) of symbiotic corals using a Junior PAM  
123 approximately every three days throughout the experiment. Corals received 8 hours of dark  
124 acclimation before Fv/Fm was measured in triplicate. The effect of temperature challenge on  
125 symbiont Fv/Fm over time was analyzed using a linear mixed effects model (*lmer*), with

126 interactions of fixed effects of treatment and day plus a random effect of genotype. Pairwise model  
127 outputs were compared using *emmeans* [32]. All analyses were performed in the R v4.2.0 statistical  
128 environment [33], and all code and raw data for the analyses detailed here can be found on Github:  
129 [https://github.com/hannahaichelman/Oculina\\_Host\\_Sym\\_GE](https://github.com/hannahaichelman/Oculina_Host_Sym_GE).

130

### 131 *Oculina arbuscula holobiont gene expression profiling*

132 On day 15, tissue from all fragments (N=48) was sampled using sterilized bone cutters,  
133 immediately preserved in 200 proof ethanol, and maintained at -80°C. Samples were homogenized  
134 with lysis buffer and glass beads and total RNA was extracted using an RNAqueous kit  
135 (ThermoFisher Scientific) following manufacturer's instructions. DNA contamination was  
136 removed *via* DNase1 and TagSeq libraries were prepared using 1.5 µg of RNA [following 25,  
137 34]. Successful libraries (N=47) were sequenced on Illumina HiSeq 2500 (single-end 50 bp) at  
138 Tufts University Core Facility. TagSeq analyses followed  
139 [https://github.com/z0on/tag-based\\_RNAseq](https://github.com/z0on/tag-based_RNAseq). Raw reads were quality filtered to remove Illumina  
140 adapters, poly-A sequences, PCR duplicates, reads less than 20 bp long, and reads with a quality  
141 score less than 33.

142

### 143 *Putative coral clone identification*

144 We tested for the presence of clones in our dataset following methods presented in Bove  
145 et al. [35]. Quality filtered reads were mapped to concatenated *O. arbuscula* and *B. psygmophilum*  
146 transcriptomes [presented in 36] using Bowtie2 [37]. Symbiont reads were removed from the  
147 dataset, genotyping and identification of host single nucleotide polymorphisms (SNPs) was  
148 performed using ANGSD [38], and putative clones were distinguished using a hierarchical

149 clustering tree (*hclust*) based on pairwise identity by state (IBS) distances calculated in ANGSD  
150 (Figure S1). After removing clones, 33 samples (N=7 putative symbiotic genotypes, N=4 putative  
151 aposymbiotic genotypes) were used in downstream analyses. See supplementary methods for  
152 additional details.

153

154 *Oculina arbuscula* and *in hospite* *B. psygmophilum* gene expression analyses

155 Quality filtered reads were mapped to the same concatenated transcriptomes described  
156 above using Bowtie2 [37], but with different parameters (-k mode, k=5, --no-hd, --no-sq). Host  
157 and symbiont reads were separated to produce two separate files of counts per gene, and  
158 independent runs of DESeq2 [39] identified differentially expressed genes (DEGs) in response to  
159 heat and cold thermal challenge relative to control using Wald's tests.

160 *Rlog*-transformed host and symbiont gene expression (GE) data were used as input for  
161 separate principal component analyses (PCAs) using *plotPCA* (package=DESeq2) to determine  
162 the effect of temperature on GE profiles using PERMANOVAs *via* the *adonis2* function  
163 [package=vegan; 40]. GE plasticity, defined as the distance in PC space between an individual's  
164 GE profile and the average GE of all samples in the control, was calculated from host and symbiont  
165 PCAs following Bove et al. [35]. Differences in GE plasticity between treatments were tested using  
166 an ANOVA followed by Tukey's HSD post-hoc tests. Model assumptions were assessed using  
167 *check\_model* [package=performance; 41].

168 Gene ontology (GO) enrichment analyses were performed using Mann-Whitney *U* tests  
169 based on the ranking of signed log p-values [42] for both host and symbiont datasets. Results were  
170 visualized in dendrograms, which indicate the amount of gene sharing between significant GO



171 categories and the direction of change relative to the control treatment. Results from the GO  
172 enrichment analyses were used for two functional analyses, detailed below.

173 First, GO delta-ranks, which quantify the tendency of genes assigned to a GO category  
174 toward up- or downregulation in treatment versus controls, were used to compare *O. arbuscula*  
175 host response under thermal challenges relative to a meta-analysis from Dixon et al. [26] that  
176 characterized the GE signatures of stress in *Acropora* corals. This meta-analysis identified two  
177 classes of coral stress responses: “type A”, which was positively correlated across projects and  
178 consistent with the coral environmental stress response (ESR), and “type B”, which was negatively  
179 correlated and indicated lower intensity stress. Host delta-ranks for Biological Processes (BP) GO  
180 terms were plotted against BP delta-ranks of all ‘type A’ studies identified by Dixon et al. [26].  
181 While not a formal statistical test, this analysis indicates whether *O. arbuscula* responses were  
182 functionally similar to a ‘type A’ ESR. Second, *B. psymphilum* symbiont GO results identified  
183 underrepresentation of photosynthesis-related GO terms under cold challenge. Genes associated  
184 with these GO categories (unadjusted p-value <0.10) were explored by constructing a heatmap  
185 using *pheatmap*.

186 Symbiont species identity of all symbiotic coral samples was confirmed using  
187 metabarcoding of the ITS2 locus (forward primer=*ITS-DINO* [43], reverse primer=*ITS2Rev2*  
188 [44]). Raw ITS2 data were submitted to SymPortal [45] to identify ITS2 defining intragenomic  
189 variant (DIV) profiles and relative abundances of DIVs across *O. arbuscula* fragments were  
190 compared using a bar plot constructed with *phyloseq* [46]. N=39/48 samples were successfully  
191 sequenced and confirmed to host *B. psymphilum* (Figure S2). See supplementary methods for  
192 additional details on library preparation and sequencing.

193

194 *Comparing orthologous genes in Oculina arbuscula and Breviolum psygmophilum in symbiosis*

195 To compare *O. arbuscula* (symbiotic and aposymbiotic) and *B. psygmophilum in hospite*  
196 responses to temperature challenges, independent GE analyses were completed on orthologous  
197 genes. This analysis allowed us to test two predictions: 1) symbiotic hosts would respond more to  
198 temperature challenge than aposymbiotic hosts, and 2) symbiotic hosts would respond more than  
199 their symbionts *in hospite*. Orthologous genes were identified following Dixon and Kenkel [47]  
200 with additional specifics for Symbiodiniaceae described here:  
201 [https://github.com/grovesdixon/symbiodinium\\_orthologs](https://github.com/grovesdixon/symbiodinium_orthologs) (details in supplemental methods).  
202 Briefly, Transdecoder v5.5.0 [48] predicted protein coding sequences, FastOrtho assigned  
203 predicted coding sequences to orthologous groups [49], and approximately-maximum-likelihood  
204 phylogenetic trees of these protein sequences were built using MAFFT [50] and FastTree [51],  
205 which resulted in a total of 1962 single-copy orthologs.

206 Single-copy orthologs (N=1962) were extracted from host and symbiont counts files and  
207 orthologs with mean count >2 in at least 80% of samples were retained, leaving 152 nonzero read  
208 count orthologs. To directly compare responses to thermal challenge of symbiotic hosts,  
209 aposymbiotic hosts, and symbionts *in hospite*, *O. arbuscula* and *B. psygmophilum* count data for  
210 these orthologs were analyzed in DESeq2, which modeled aggregate factors of temperature  
211 treatment and sample type (symbiotic host, aposymbiotic host, or symbiont *in hospite*). Responses  
212 of sample types to heat and cold challenge relative to control were quantified as the number of  
213 differentially expressed orthologs (DEOs, adjusted p-value <0.1). Differences in the proportion of  
214 DEOs across sample types were tested with a two-proportions z-test.

215

216 ***II. Experiment 2: Breviolum psygmophilum response in culture - ex hospite***

217 *Symbiont cell culture maintenance*

218 To isolate *B. psygmophilum* responses to temperature challenge *ex hospite*, *O. arbuscula*  
219 holobiont thermal challenges were replicated on cultured *B. psygmophilum*. *Breviolum*  
220 *psygmophilum* cells were isolated from *O. arbuscula* from Radio Island, NC by serially diluting  
221 airbrushed host tissue into sterile F/2 media (Bigelow NCMA, East Boothbay, ME, USA). The  
222 “ancestral culture” was maintained in F/2 media based on artificial seawater (Instant Ocean), with  
223 monthly transfers to fresh media, in a Percival incubator (model AL-30L2) at 26°C and irradiance  
224 of 30  $\mu\text{mol photons m}^{-2} \text{sec}^{-1}$  on a 14:10 hour light:dark cycle. After four months, this ancestral  
225 culture was split into three flasks, each with 100 mL of F/2 media and 0.5 mL of dense cells. These  
226 “daughter cultures” were acclimated to 18°C by decreasing temperatures at a rate of 1°C day<sup>-1</sup> over  
227 a span of nine days. A preliminary experiment established semi-continuous culture methodology  
228 (Figure S3A; supplementary methods). Cultured symbiont species identity was confirmed prior to  
229 thermal challenge experiments using Sanger sequencing (details in supplementary methods).

230

231 *Thermal challenge experiment*

232 *Breviolum psygmophilum* cultures were exposed to thermal challenges that mirrored  
233 treatments used in holobiont experiments detailed in Part I. *Ex hospite* symbiont thermal  
234 challenges began after a 51-week acclimation at 18°C. Experimental cultures (N=4 flasks per  
235 treatment) were established from long-term acclimated daughter flasks, with initial cell densities  
236 of 200,000 cells mL<sup>-1</sup> in 100 mL of F/2 media. Heat and cold challenge flasks were placed in  
237 separate Percival incubators (model AL-30L2), and control flasks were maintained in a  
238 temperature-controlled room (Harris Environmental Systems, Andover, MA). All treatments  
239 began at 18°C and followed a 14:10 hour light:dark cycle at  $\sim 50 \mu\text{mol photons m}^{-2} \text{sec}^{-1}$ .

240 Experimental cultures were grown semi-continuously, with the timing of transfers determined  
241 using the preliminary experiment (Figure S3).

242

243 *Ex hospite Breviolum psysgmophilum gene expression profiling*

244 On day 15, all cultures were thoroughly mixed, concentrated *via* centrifugation (5000  
245 RPM, 7 minutes), flash frozen in liquid nitrogen, and stored at -80°C. To obtain sufficient RNA  
246 for TagSeq, replicate cultures in cold challenge treatments were pooled, such that there were four  
247 pooled replicates extracted separately. Lower cell densities in cold challenge were due to reduced  
248 growth (Figure S3), which was not the case for heat challenge and control flasks. Flash frozen  
249 pellets were ground for three minutes in a mortar and pestle that was pre-chilled with liquid  
250 nitrogen. Additional liquid nitrogen was added to keep the cell pellet frozen and RNA was  
251 extracted using RNAqueous-micro kits (ThermoFisher Scientific) following manufacturer's  
252 instructions, except elution volume was 15  $\mu$ L. DNA was removed *via* DNA-free DNA Removal  
253 Kit (ThermoFisher Scientific). RNA was normalized using concentrations from a Quant-iT  
254 PicoGreen dsDNA Assay (ThermoFisher Scientific) and total RNA was sent to the University of  
255 Texas at Austin Genome Sequencing and Analysis Facility (GSAF), where it was prepared for  
256 TagSeq following Meyer et al. [25] on a NovaSeq 6000 machine (single-end 100 bp).

257

258 *Gene expression analyses on ex hospite Breviolum psysgmophilum*

259 Raw read processing of *ex hospite B. psysgmophilum* TagSeq data followed methods  
260 detailed in Part I except samples were only mapped to the *B. psysgmophilum* reference  
261 transcriptome. Principal component analysis (PCAs), GE plasticity, and GO-enrichment analyses  
262 were conducted as detailed in Part I. A heat-map of genes with GO annotations related to

263 photosynthesis was generated on the culture dataset with an unadjusted p-value <0.01 to restrict  
264 the number of DEGs included. In addition, a heatmap of genes with GO annotations related to  
265 oxidative stress was constructed, as these terms were consistently enriched in *ex hospite* GO  
266 analyses.

267

### 268 ***III. Comparing Breviolum psygmophilum response in and ex hospite***

269 To test the prediction that symbionts would respond more to temperature challenge *ex*  
270 *hospite* compared to *in hospite*, *B. psygmophilum* GE datasets from Experiments I and II were  
271 analyzed together. A batch effect correction was conducted on combined raw count data using  
272 ComBat-seq [52], with a specified batch of experiment type (*in hospite* or *ex hospite*) and  
273 temperature treatment (heat challenge, cold challenge, or control) as the treatment of interest.  
274 Batch-corrected data were included in the same DESeq2 [39] model, which modeled a main effect  
275 of the aggregate factor of treatment (cold challenge, heat challenge, or control) and sample type  
276 (*in hospite* or *ex hospite*). Genes were only retained when present in at least 80% of samples (33/41  
277 samples) at a mean count of 2 or higher, which left 1885 genes for downstream analyses.

278 Following PCAs detailed in Experiment I, combined symbiont count data were *rlog*-  
279 transformed and used as input for a PCA to test the effect of the aggregate factor of temperature  
280 treatment and sample type on GE. Significance was assessed with PERMANOVA, using the  
281 *adonis2* function [package=vegan; 40]. GE plasticity was also calculated following methods  
282 detailed above.

283

284

285

## 286 Results

### 287 *I. Independent responses of Oculina arbuscula and Breviolum psygmophilum to temperature*

#### 288 *challenges in symbiosis*

289 *Oculina arbuscula* hosts exhibit stronger gene expression responses to cold challenge than heat

290 challenge regardless of symbiotic state

291 The aggregate factor of temperature treatment and symbiotic state had a significant effect

292 on *O. arbuscula* host gene expression patterns (Figure 2A; *ADONIS*  $p=0.001$ ) with cold challenge

293 eliciting higher gene expression plasticity in both symbiotic (*Tukey HSD*  $p=0.013$ ) and

294 aposymbiotic (*Tukey HSD*  $p<0.001$ ) hosts compared to heat challenge (Figure 2B;  $p<0.001$ ).

295 Symbiotic state did not influence gene expression plasticity within temperature treatments (cold

296 challenge, *Tukey HSD*  $p=0.218$ ; heat challenge, *Tukey HSD*  $p=0.992$ ; Figure 2B).

297 When comparing GO delta ranks of the ‘type A’ module from Dixon *et al.* [26] to symbiotic

298 and aposymbiotic *O. arbuscula* host delta-ranks from the thermal challenges, positive relationships

299 were observed for biological processes GO terms for all comparisons (Figure 2C).

300

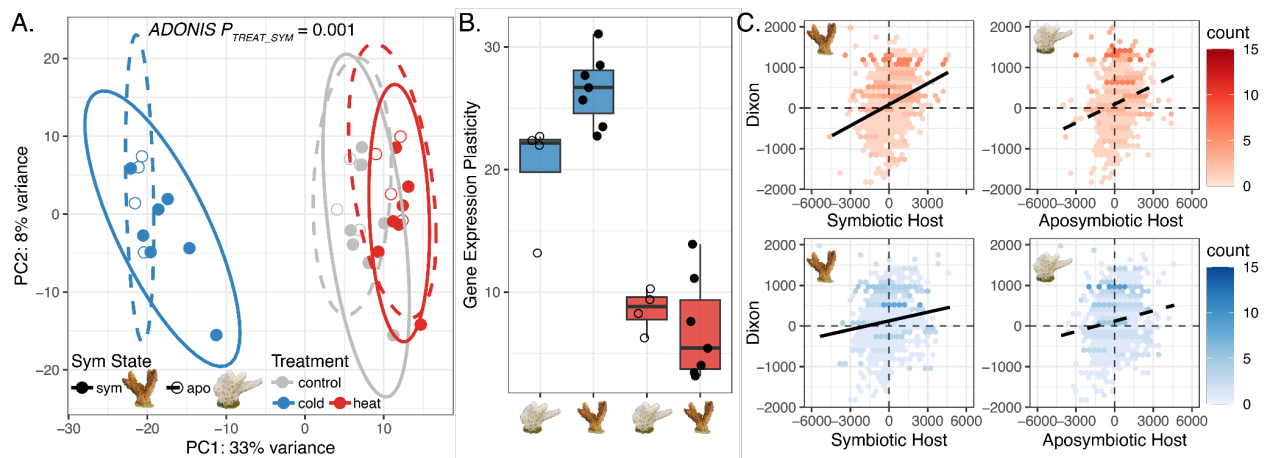

301

302 **Figure 2. Symbiotic and aposymbiotic *Oculina arbuscula* host gene expression responses to**

303 **temperature challenges. A. Principal component analysis (PCA) of gene expression of symbiotic**

304 **(solid point and line) and aposymbiotic (open points, dashed line) coral hosts under control (grey),**

305 cold (blue), and heat (red) challenge. The x- and y-axes represent the % variance explained by the  
306 first and second PC, respectively. **B.** Gene expression plasticity of symbiotic and aposymbiotic  
307 hosts under cold and heat challenges. **C.** Relationship between biological processes (BP) gene  
308 ontology (GO) delta ranks from symbiotic (left) and aposymbiotic (right) hosts under heat (top)  
309 and cold (bottom) challenge with BP delta-ranks of all “type A” studies from [26]. Positive slopes  
310 represent “type A” environmental stress responses.  
311

### 312 *Negative effects of cold challenge on Breviolum psygmophilum photosynthetic function*

313 ITS2 metabarcoding confirmed all *O. arbuscula* genotypes hosted a majority of *B.*  
314 *psygmophilum* defining intragenomic variants (DIVs) (Figure S2). All but one individual hosted  
315 100% *B. psygmophilum*, and all symbiotic *O. arbuscula* fragments hosted the same DIV of *B.*  
316 *psygmophilum* (Figure S2). Photosynthetic efficiency (Fv/Fm) of *in hospite B. psygmophilum* was  
317 reduced by temperature challenges through time (Figure 3A;  $p < 0.001$ ). By day 8 (cold  
318 challenge=11°C, heat challenge=25°C), Fv/Fm had significantly declined in the cold challenge  
319 relative to controls ( $p = 0.02$ ), but not in heat challenge ( $p = 0.09$ ). For the remainder of the  
320 experiment, Fv/Fm was significantly reduced in both cold and heat challenge relative to the control  
321 (Figure 3A;  $p < 0.001$  for all comparisons). Fv/Fm in cold challenge corals was more dramatically  
322 reduced than under heat challenge, with fixed effect parameter estimates on day 14 of -0.065 in  
323 heat challenge and -0.24 in cold challenge relative to control (Figure 3A).

324 Temperature challenges significantly affected gene expression profiles of *in hospite B.*  
325 *psygmophilum* (Figure 3B; *ADONIS*  $p = 0.001$ ). However, no differences in gene expression  
326 plasticity between symbionts in cold and heat challenge were observed (Figure 3C; *Tukey HSD*  
327  $p = 0.62$ ). Corroborating negative effects of cold challenge on *B. psygmophilum* Fv/Fm (Figure 3A),  
328 six GO terms related to photosynthetic processes were underrepresented in cold challenge relative  
329 to control conditions (photosystem [GO:0009521], photosynthesis, light harvesting  
330 [GO:0009765], chlorophyll binding [GO:0016168], protein-chromophore linkage [GO:0018298],

331 thylakoid membrane [GO:0042651], and tetrapyrrole binding [GO:0046906]). Six annotated genes  
 332 within these GO terms were downregulated under cold challenge (unadjusted p-value<0.10)  
 333 relative to control conditions and these genes included light-harvesting complex (LHC) and  
 334 chloroplast genes (Figure 3D).

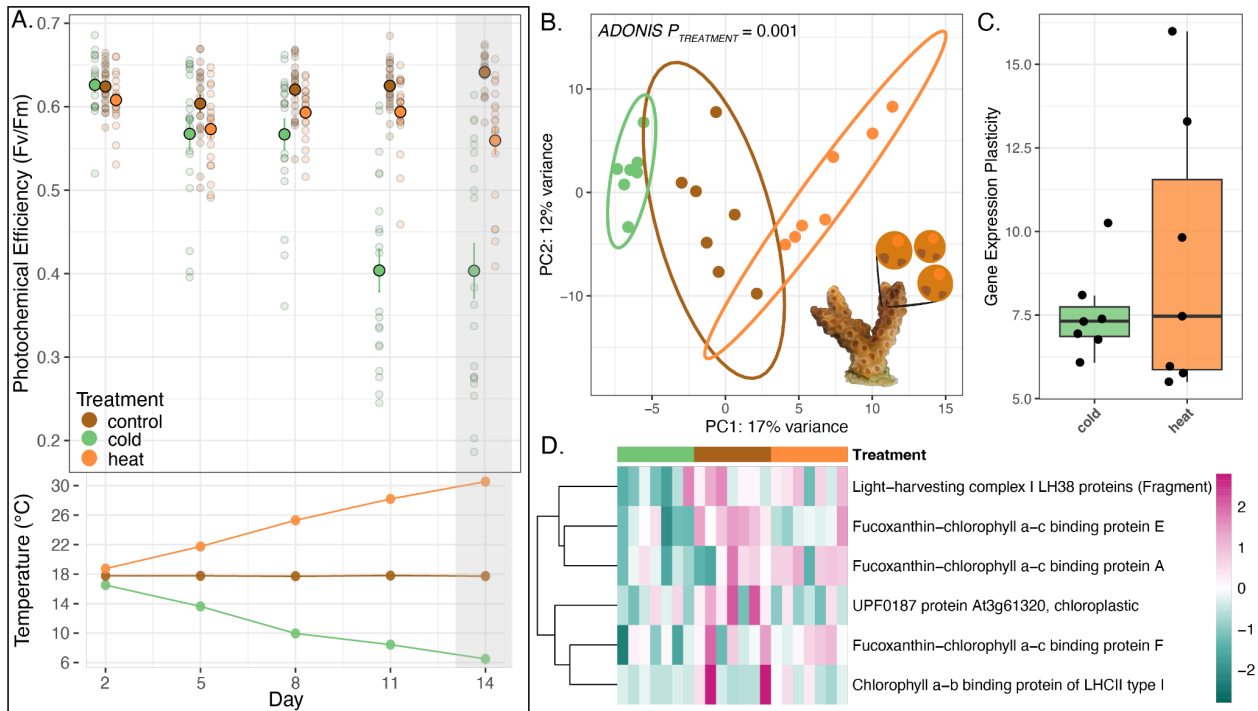

335  
 336 **Figure 3. *In hospite* symbiont physiology and gene expression responses to temperature**  
 337 **challenges.** **A.** Photochemical efficiency (Fv/Fm, top panel) of *in hospite* symbionts through time  
 338 as temperatures diverged (bottom panel). Top: Large points represent mean Fv/Fm ± standard error  
 339 across treatments and transparent points represent a fragment's Fv/Fm at each time point. The gray  
 340 bar indicates the time point immediately prior to sampling for gene expression. **B.** Principal  
 341 component analysis (PCA) of gene expression of *in hospite* symbionts from A on day 15. **C.** Gene  
 342 expression plasticity of *in hospite* symbionts under cold (green) and heat (orange) challenge was  
 343 not significantly different (Tukey HSD  $p=0.62$ ). **D.** Heatmap showing differentially expressed  
 344 genes (DEGs; unadjusted p-value<0.1) belonging to photosynthesis gene ontology (GO) terms,  
 345 where each row is a gene and each column is a sample. The color scale represents log<sub>2</sub> fold change  
 346 relative to the gene's mean, where pink represents up-regulation and teal represents down-  
 347 regulation.

348  
 349  
 350

351



352 **II. Comparing response of *Oculina arbuscula* and *Breviolum psygmophilum* in symbiosis**  
353 **using orthologous genes**

354 More differentially expressed orthologs (DEOs) were observed in symbiotic hosts  
355 compared to aposymbiotic hosts under cold challenge ( $X^2 = 4.76$ ;  $p=0.015$ ), but not heat challenge  
356 (Figure 4;  $X^2 = 0.482$ ;  $p=0.24$ ). Similarly, aposymbiotic hosts exhibited more DEOs compared to  
357 *in hospite* *B. psygmophilum* under cold challenge ( $X^2 = 37.7$ ;  $p<0.0001$ ), but not heat challenge  
358 (Figure 4;  $X^2 = 0.781$ ;  $p=0.188$ ). The number of DEOs was greater in symbiotic hosts compared  
359 to *in hospite* symbionts under both cold challenge ( $X^2 = 64.3$ ;  $p<0.0001$ ) and heat challenge (Figure  
360 4;  $X^2 = 3.23$ ;  $p=0.036$ ).

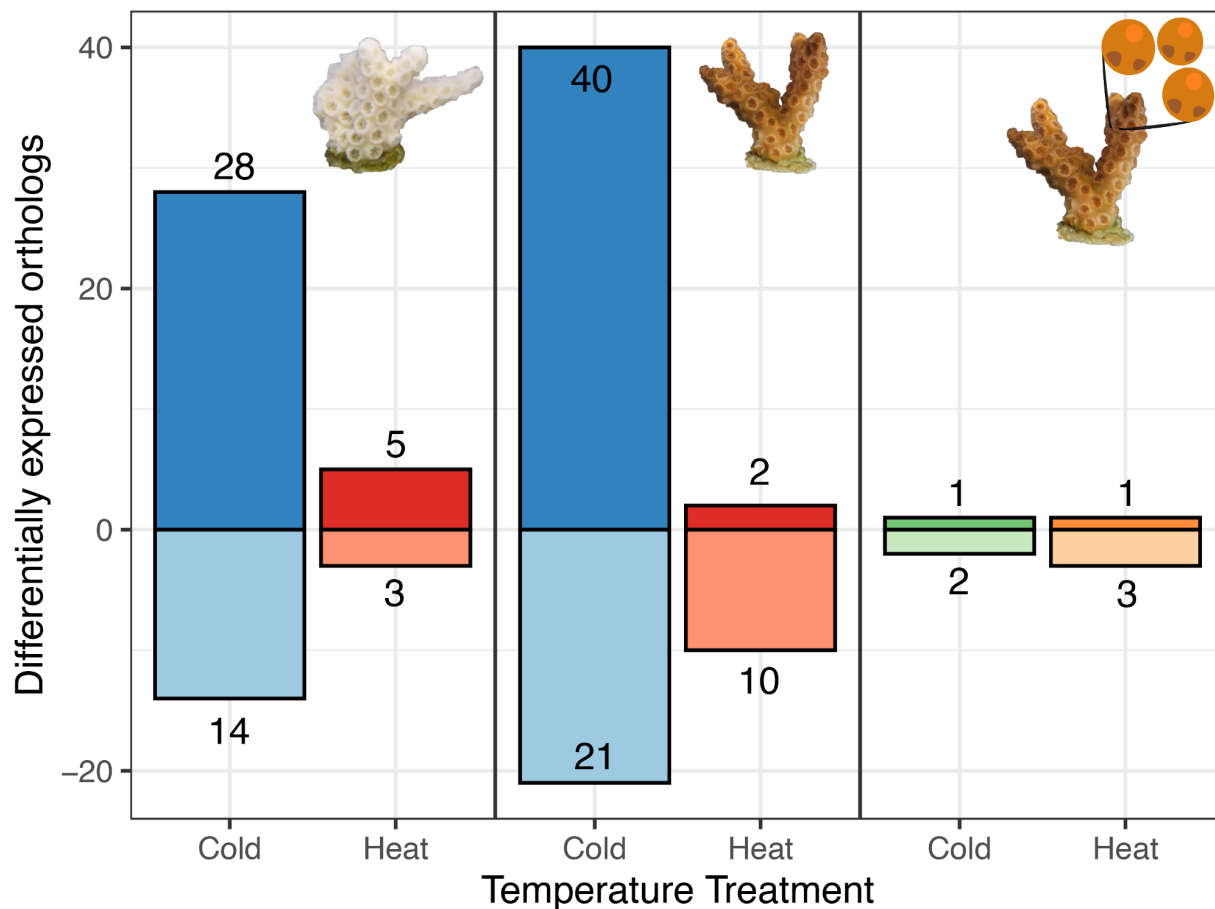

361

362 **Figure 4. Coral hosts exhibit more differentially expressed orthologs (DEOs) than *in hospite***  
363 **symbionts under thermal challenges.** Bar plots representing the number of DEOs (positive  
364 values=up-regulated, negative values=down-regulated) in response to temperature challenges in  
365 aposymbiotic hosts (left), symbiotic hosts (center), and *in hospite* symbionts (right). Symbiotic *O.*  
366 *arbuscula* had significantly more DEOs than *in hospite* *B. psygmophilum* under cold challenge  
367 ( $p<0.0001$ ) and heat challenge ( $p=0.036$ ). Aposymbiotic *O. arbuscula* had significantly more  
368 DEOs than *in hospite* *B. psygmophilum* under cold challenge ( $p<0.0001$ ), but not heat challenge  
369 ( $p=0.188$ ). Symbiotic *O. arbuscula* had significantly more DEOs than aposymbiotic *O. arbuscula*  
370 under cold challenge ( $p=0.015$ ), but not heat challenge ( $p=0.244$ ).

371

372

373

### 374 ***III. Breviolum psygmophilum response to temperature challenge out of symbiosis - ex hospite***

375 Sanger sequencing confirmed that all parent cultures matched *B. psygmophilum* (GenBank  
376 Accession ID LK934671.1) with 100% percent identity and 53-87% query coverage. *Breviolum*  
377 *psygmophilum* cultures in all treatments were maintained in exponential growth phase throughout  
378 the experiment (Figure S3B,C). Thermal challenges significantly affected gene expression patterns  
379 of *ex hospite* *B. psygmophilum* (Figure 5A; *ADONIS*  $p=0.001$ ). Gene expression plasticity was  
380 greater in *ex hospite* *B. psygmophilum* under cold challenge relative to heat challenge (Figure 5B;  
381 *Tukey HSD*  $p=0.008$ ), whereas no significant effect was observed *in hospite* (Figure 3C).

382

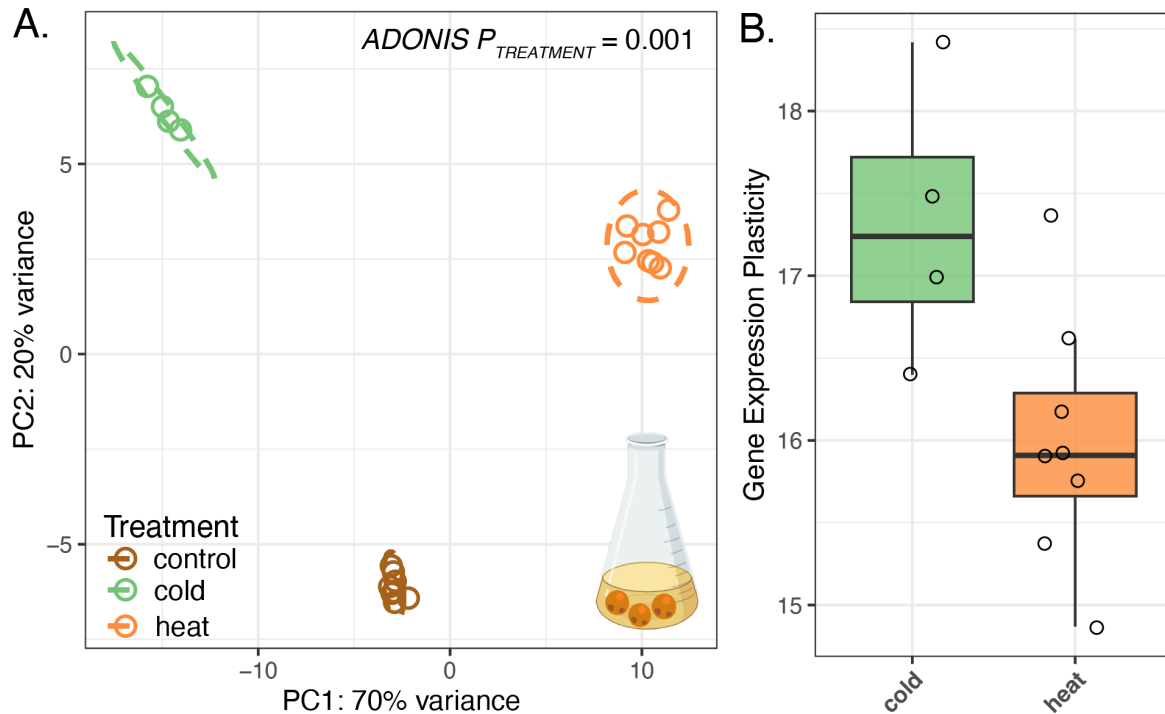

383

384 **Figure 5. *Ex hospite* symbiont gene expression responses to temperature challenges. A.**  
385 Principal component analysis (PCA) of gene expression of *ex hospite* symbionts under temperature  
386 challenges. **B.** Gene expression plasticity of symbionts *ex hospite* under cold (green) and heat  
387 (orange) challenge. Gene expression plasticity was significantly greater under cold challenge  
388 compared to heat challenge (*Tukey HSD*  $p=0.008$ ). Culture icon created with BioRender.com.  
389

390 Eight photosynthesis-related GO terms were underrepresented in *ex hospite* *B.*  
391 *psycmophilum* under cold challenge (photosystem [GO:0009521], photosynthesis, light harvesting  
392 [GO:0009765], chloroplast-nucleus signaling pathway [GO:0010019], photosynthesis  
393 [GO:0015979], chlorophyll binding [GO:0016168], protein-chromophore linkage [GO:0018298],  
394 thylakoid membrane [GO:0042651], and tetrapyrrole binding [GO:0046906]). A heat map of 59  
395 DEGs (unadjusted  $p$ -value<0.01) under cold challenge belonging to these GO terms showcased a  
396 small group of up-regulated genes and a larger group of down-regulated genes under cold  
397 challenge (Figure 6A). Up-regulated photosynthesis-related genes included “Pentatricopeptide  
398 repeat-containing proteins”, which are involved in RNA editing events in chloroplasts [53].

399 Similar to *B. psymophilum* in symbiosis (Figure 3C), genes involved in the LHC were down-  
400 regulated under cold challenge (Figure 6A).

401 Five GO terms commonly associated with stress were differentially enriched in *ex hospite*  
402 *B. psymophilum* under cold challenge relative to control conditions (protein folding  
403 [GO:0006457], cellular response to oxidative stress [GO:0034599], hydrogen peroxide metabolic  
404 process [GO:0042743], unfolded protein binding [GO:0051082], cellular response to chemical  
405 stress [GO:0062197]). A heat map of 69 DEGs under cold challenge (unadjusted p-value<0.01)  
406 assigned to these GO terms and revealed two groups of genes, one down-regulated and one up-  
407 regulated under cold challenge relative to control and heat challenge cultures (Figure 6B).

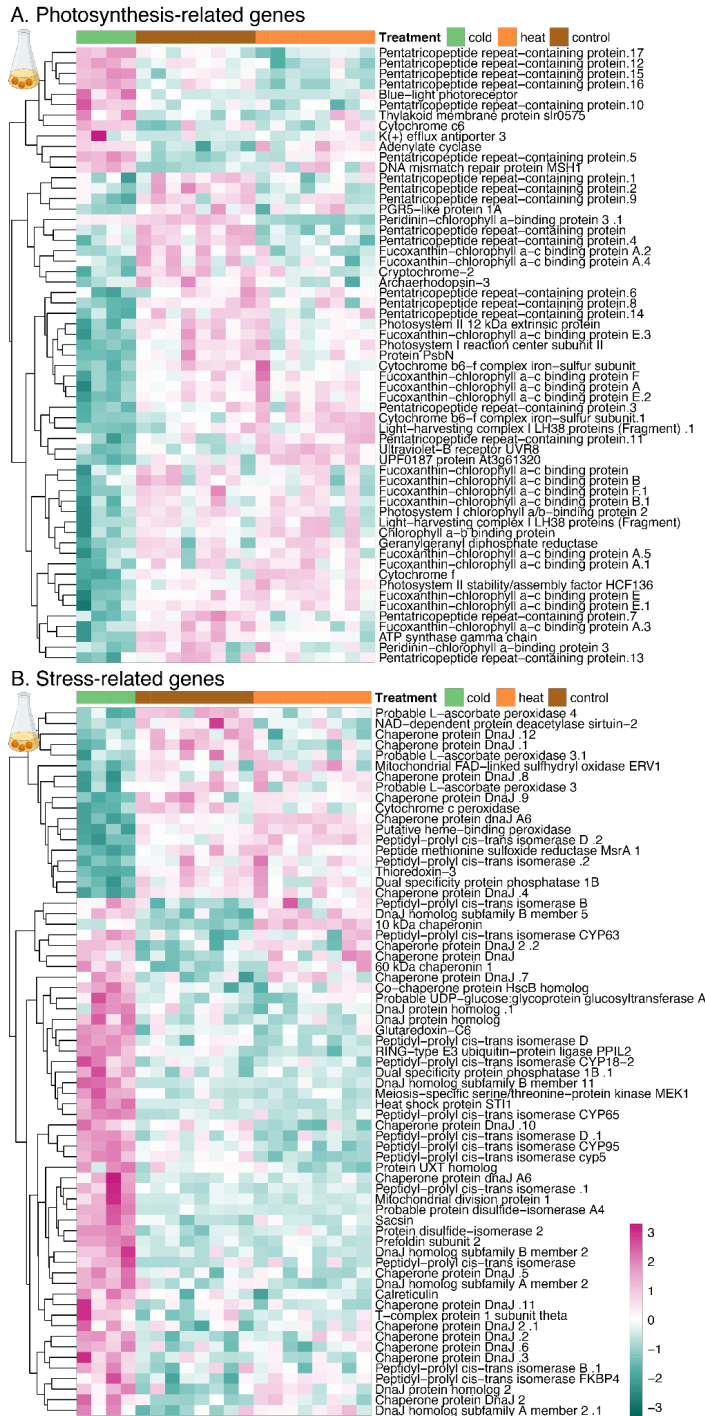

408

409 **Figure 6. *Ex hospite* symbionts exhibit differential expression of photosynthesis and stress-**  
 410 **related genes under cold challenge.** Heatmap showing differentially expressed genes (DEGs;  
 411 unadjusted p-value<0.01) belonging to photosynthesis (A) and stress (B) gene ontology (GO)  
 412 terms, where each row is a gene and each column is a sample. The color scale represents log<sub>2</sub> fold  
 413 change relative to the gene's mean, where pink represents up-regulation and teal represents down-  
 414 regulation. Culture icons created with BioRender.com.

415

#### 416 **IV. Comparing responses of in and ex hospite *Breviolum psygmophilum***

417 When analyzing *in hospite* and *ex hospite* *B. psygmophilum* in the same DESeq2 model, a  
418 significant effect of the aggregate factor of temperature treatment and symbiotic state was observed  
419 (Figure 7A; *ADONIS*  $p=0.001$ ). Temperature and symbiotic state also had significant effects on  
420 gene expression plasticity (Figure 7B;  $p<0.0001$ ), and *ex hospite* *B. psygmophilum* had  
421 significantly higher gene expression plasticity compared to *in hospite* *B. psygmophilum*, both  
422 under cold challenge (Tukey HSD  $p<0.0001$ ) and heat challenge (Figure 7B; Tukey HSD  
423  $p=0.0001$ ).

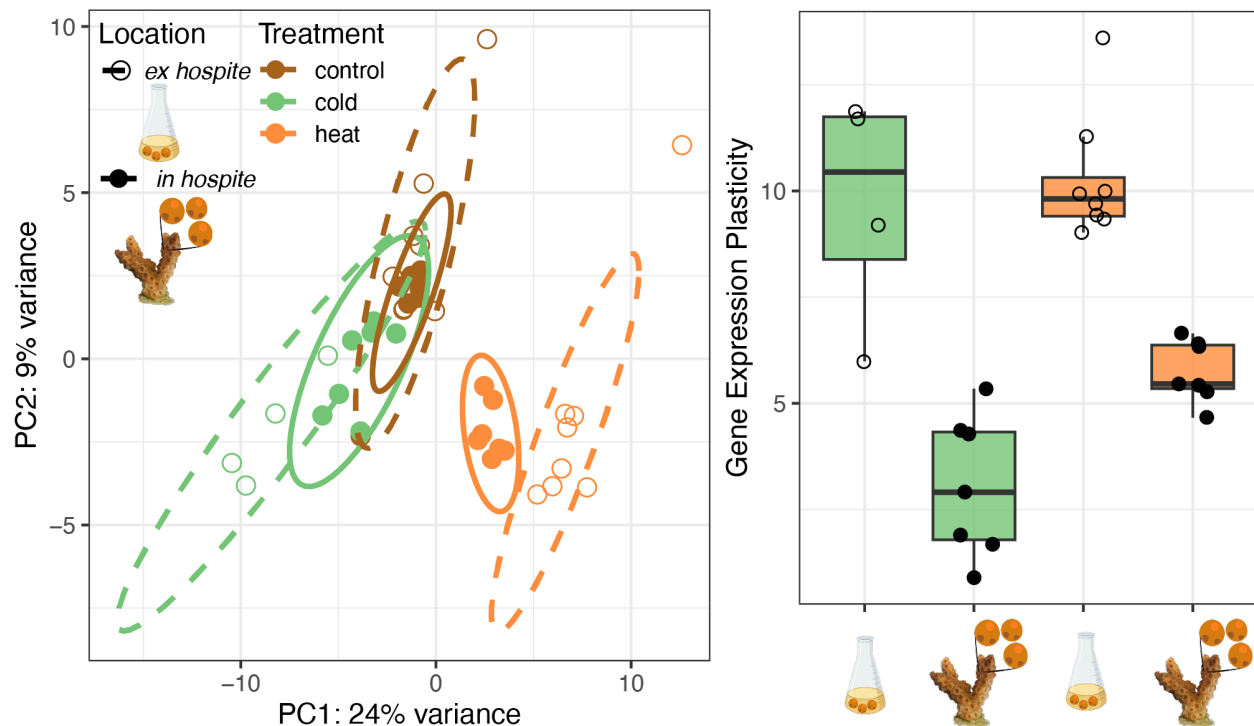

424

425 **Figure 7. *Ex hospite* symbionts respond more strongly to thermal challenges than *in hospite***  
426 **symbionts. A.** Principal component analysis (PCA) of gene expression of *ex hospite* (open circles,  
427 dashed lines) and *in hospite* (solid points and lines) symbionts under control, cold, and heat  
428 temperatures. **B.** Gene expression plasticity of *ex hospite* and *in hospite* symbionts under cold  
429 (green) and heat (orange) challenge. Gene expression plasticity was significantly greater in *ex*  
430 *hospite* symbionts compared to *in hospite* symbionts under both cold challenge (Tukey HSD  
431  $p<0.0001$ ) and heat challenge (Tukey HSD  $p=0.0001$ ). Culture icons created with BioRender.com.

432

433

434

435

## 436 Discussion

437 *Both aposymbiotic and symbiotic coral hosts exhibit classic environmental stress responses to*  
438 *temperature challenges*

439 We leveraged genome-wide gene expression profiling of *in* and *ex hospite* facultative coral  
440 hosts (*Oculina arbuscula*) and their algal symbionts (*Breviolum psygmophilum*) to disentangle the  
441 independent responses of hosts and symbionts to divergent thermal challenges across symbiotic  
442 states. In contrast to our prediction that symbiosis would alter the response of corals to thermal  
443 challenge, we found that both heat and cold challenges elicited general ESRs [‘type A’, 26]  
444 regardless of symbiotic state. Additionally, both symbiotic and aposymbiotic hosts exhibited  
445 greater gene expression plasticity in response to cold challenge compared to heat, aligning with  
446 previous work on the facultatively symbiotic coral *Astrangia poculata* when exposed to similar  
447 temperature challenges [54]. Wuitchik et al. [54] found that aposymbiotic *A. poculata* in cold  
448 challenge (6°C) exhibited five times more differentially expressed genes (DEGs) than in heat  
449 (31°C), corroborating the higher gene expression plasticity and number of differentially expressed  
450 orthologs (DEOs) observed in *O. arbuscula* under cold challenge. However, Wuitchik et al. [54]  
451 found cold challenge elicited a more severe ESR response [‘type A’, 26]) than heat challenge  
452 [‘type B’, 26], contrasting our findings that both thermal challenges elicited type A responses  
453 across symbiotic states. This pattern suggests that, even though *O. arbuscula* exhibited higher gene  
454 expression plasticity under cold challenge, corals in both temperature challenges were exhibiting  
455 stress responses consistent with a tropical coral’s ESR, highlighting the utility of *O. arbuscula* as  
456 a calcifying model for symbiosis [36].

457 The type A response presented in Dixon et al. [26] is characterized by functional  
458 enrichment of the coral ESR, including downregulation of cell division and upregulation of cell

459 death, response to ROS, protein degradation, NF- $\kappa$ B signaling, immune response, and protein  
460 folding. Specifically, type A datasets in tropical *Acropora* showcased upregulation of ROS and  
461 protein folding [26]. This informed our hypothesis that temperature challenge would result in an  
462 ESR-like response, akin to a type A response, in symbiotic *O. arbuscula* but not in aposymbiotic  
463 individuals. Instead, we observed that both symbiotic and aposymbiotic *O. arbuscula* exhibited  
464 type A responses under heat and cold challenge. This pattern could be the result of background  
465 symbionts in aposymbiotic corals [as previously observed in aposymbiotic *Astrangia poculata*,  
466 55] producing ROS and leading to a type A response. Alternatively, aposymbiotic corals may be  
467 light-stressed as they lack shading from symbionts [e.g., 56]. Additionally, the temperature  
468 challenges applied here were relatively short, and it is possible that symbiotic and aposymbiotic  
469 *O. arbuscula* would have exhibited differential responses if the challenges had been more extreme  
470 in temperature or duration [57]. In general, facultatively symbiotic corals are understudied, and  
471 future work should explore the responses of symbiotic and aposymbiotic corals under different  
472 stressors (*i.e.*, light, nutrients) and for longer durations [as in 58].

473

#### 474 *Evidence of host buffering in O. arbuscula holobionts*

475 We present three forms of evidence suggesting that *O. arbuscula* hosts are buffering their  
476 algal symbionts under thermal extremes: 1. The coral host exhibited more differentially expressed  
477 orthologs (DEOs) than its symbiont under cold challenge, 2. Stress-related genes were  
478 differentially expressed in symbionts *ex hospite* but not *in hospite*, and 3. *Ex hospite* symbionts  
479 exhibited higher gene expression plasticity in response to temperature challenges than *in hospite*  
480 symbionts. Higher gene expression plasticity in coral hosts compared to symbionts in symbiosis  
481 aligns with previous evidence suggesting that cnidarian hosts and their algal symbionts exhibit



482 strong differences in the magnitude of gene expression responses under environmental challenges.  
483 For example, Davies et al. [59] reported that the tropical coral *Siderastrea siderea* exposed to 95-  
484 day temperature and ocean acidification challenges resulted in hosts consistently exhibiting greater  
485 differential expression of highly conserved genes compared to their symbiont *Cladocopium*  
486 *goreau*. Barshis et al. [27] also found no changes in gene expression in either heat-susceptible  
487 *Cladocopium* (type C3K) or heat-tolerant *Durusdinium* (type D2) in symbiosis with *Acropora*  
488 *hyacinthus* following three days of high temperature exposure, which contrasted strong gene  
489 expression responses in the host [60]. Corroborating these patterns, Leggat et al. [29] observed  
490 that algae (*Cladocopium* C3) exhibited little change in expression of six stress and metabolic genes  
491 compared to their hosts (*Acropora aspera*).

492 Symbiosis itself has also been observed to alter gene expression patterns and physiology  
493 in Symbiodiniaceae algae. Here, we observed differential regulation of stress-related GO terms  
494 under cold challenge *ex hospite*, and genes within those terms included up-regulation of a heat  
495 shock protein (heat shock protein STI1) and a ubiquitin-related gene (RING-type E3 ubiquitin-  
496 protein ligase PPIL2). These genes are both classic ESR genes in tropical corals [26] and their  
497 differential regulation *ex hospite* highlights the potential benefits of a symbiotic lifestyle for  
498 Symbiodiniaceae. Symbiosis mitigating Symbiodiniaceae stress responses have been previously  
499 shown. For example, gene expression of *ex hospite* *Durusdinium trenchii* maintained at 28°C  
500 exhibited enrichment of the GO term “response to temperature stimulus” relative to *in hospite* *D.*  
501 *trenchii* in *Exaiptasia pallida*, which authors attributed to the protective microenvironment of the  
502 symbiosome [61]. Additionally, Maor-Landaw et al. [62] compared gene expression of *Breviolum*  
503 *minutum* in culture to *B. minutum* freshly isolated from *Exaiptasia diaphana* and observed down-  
504 regulation of genes indicative of the protected and stress-reduced environment of the symbiosome.

505 Specifically, pentatricopeptide repeats (PPR), which have been previously associated with  
506 Symbiodiniaceae RNA processing in response to environmental stress and were included in the  
507 repertoire of “stress responsive genes” in *Fugacium kawautii* [63], were down-regulated in freshly  
508 isolated *B. minutum* [62]. These findings support our third piece of evidence for host buffering.  
509 Together, these data suggest that *in hospite* symbionts respond less at the level of gene expression  
510 to cope with temperature challenges compared to *ex hospite* symbionts, providing further evidence  
511 that cnidarian hosts exert control over the symbiont’s micro-environment under environmental  
512 stress.

513  
514 *Cold challenge elicited negative effects on photosynthesis of ex hospite and in hospite Breviolum*  
515 *psygmophilum*

516 Although responses of *B. psygmophilum in hospite* were muted (*i.e.*, fewer DEGs and  
517 DEOs) under temperature challenges compared to responses *ex hospite*, negative effects on  
518 photosynthesis were observed at the level of phenotype (*in hospite* Fv/Fm) and gene expression  
519 (both *in hospite* and *ex hospite*), particularly under cold challenge. *Ex hospite B. psygmophilum*  
520 exhibited differential expression of photosynthesis and stress genes, including down-regulation of  
521 light harvesting complex (LHC) genes under cold challenge. This aligns with previous work  
522 investigating how symbiosis affects Symbiodiniaceae photosynthesis. For example, Bellantuono  
523 et al. [61] found that photosynthetic processes were modified in *D. trenchii* living *in hospite*  
524 compared to *ex hospite*. Specifically, GO terms related to photosynthesis (*i.e.*, photosynthesis,  
525 photosystem II repair, and light harvesting) were enriched *in hospite* compared to *ex hospite*, which  
526 may result from host carbon concentrating mechanisms increasing the availability of CO<sub>2</sub> *in*  
527 *hospite*. In addition, we observed reduced Fv/Fm of *in hospite B. psygmophilum*, aligning with

528 previous work demonstrating reduced Fv/Fm in cultured *B. psygmophilum* exposed to simulated  
529 seasonal temperature declines (cooled from 26°C to 10°C and for two weeks before returning to  
530 26°C) [64]. In that study, *B. psygmophilum* Fv/Fm recovered to pre-challenge values once  
531 temperatures were returned to baseline, while other Symbiodiniaceae species that typically  
532 associate with tropical corals failed to regain Fv/Fm following cold challenge [64]. This difference  
533 was attributed to *B. psygmophilum*'s symbiosis with corals in temperate/subtropical areas where  
534 they experience larger annual temperature variation, aligning with a recent report of its wide  
535 thermal breadth (16.15°C) compared to six other Symbiodiniaceae isolates [65]. Therefore, Fv/Fm  
536 declines coupled with down-regulation of photosynthesis genes could represent *B.*  
537 *psygmophilum*'s seasonal response to low temperatures, and if the cultures were returned to control  
538 conditions, they may have recovered.

539 While we only observed strong phenotypic and gene expression responses of *B.*  
540 *psygmophilum* under cold challenge and not heat challenge, these links between photosynthetic  
541 disruption and transcriptional regulation of photosynthetic machinery align closely with previous  
542 work on Symbiodiniaceae under heat stress. Previous work has highlighted that heat stress can  
543 inhibit the synthesis and resulting mRNA pool of an antenna protein of the light harvesting  
544 complex (acpPC) in Symbiodiniaceae [66]. Additionally, temperature anomalies can alter  
545 thylakoid membrane fluidity, decoupling light harvesting and photochemistry, which suppresses  
546 ATP synthesis and results in increased reactive oxygen species (ROS) in Symbiodiniaceae [67].  
547 LHCs are well-known for transferring absorbed light energy to the photosynthetic reaction center,  
548 but they also play an important role in photoprotection and have been linked to thermal sensitivity  
549 in Symbiodiniaceae [66]. Decreasing the number of peripheral LHCs may serve as a  
550 photoprotective mechanism under heat stress, as it ultimately decreases the light reaching

551 photosynthetic reaction centers and reduces the risk of damage to D1 reaction center proteins [68].  
552 It is possible that LHC down-regulation may represent a photoprotective mechanism in *B.*  
553 *psymmophilum* under any thermal stress. While Symbiodiniaceae gene expression in response to  
554 cold challenge remains largely unexplored, evidence suggests that cold challenge induces similar  
555 photophysiology responses as heat challenge in Symbiodiniaceae [e.g., 64, 69–72]. It is therefore  
556 possible that the heat challenge explored here was not high enough or long enough to elicit a  
557 similarly negative response as cold challenge. Indeed, Fv/Fm of *in hospite B. psymmophilum* under  
558 heat challenge was declining, but remained significantly higher than in cold challenge. This pattern  
559 aligns with Roth et al. [72], who found that cold challenge was more immediately harmful for  
560 *Acropora yongei* symbiosis, but heat stress was more harmful in the long term. Although *ex hospite*  
561 *B. psymmophilum* Fv/Fm was not quantified here, differential regulation of photosynthesis and  
562 stress-related genes suggests an even stronger negative impact of cold stress on photosynthesis *ex*  
563 *hospite*. Altogether, future work would benefit from longer and more extreme temperature  
564 challenges to ensure that the entire thermal niche is investigated. Lastly, future studies quantifying  
565 additional phenotypes in both *in* and *ex hospite B. psymmophilum* to determine if such convergent  
566 responses to temperature challenge exist are warranted.

567

#### 568 *Alternative hypotheses for “host buffering” and proposed future experiments*

569       Transcriptional regulation is only one molecular process involved in responding to thermal  
570 stress. Mounting evidence suggests that a lack of transcriptional response under environmental  
571 challenges could be the result of post-transcriptional and/or post-translational mechanisms in  
572 Symbiodiniaceae. This includes evidence of microRNA (miRNA)-based gene regulatory  
573 mechanisms in Symbiodiniaceae [28, 73], which aligns with the genomic evidence that

574 dinoflagellates may be more capable of translational rather than transcriptional regulation [74].  
575 Previous work in *Symbiodinium microadriaticum* highlighted that a lack of common transcription  
576 factors and few DEGs could be attributed to small RNA (smRNA) post-transcriptional gene  
577 regulatory mechanisms [28]. It has also been proposed that the lack of transcriptional regulation  
578 in Symbiodiniaceae could be due to gene duplication as a mechanism to increase transcript and  
579 protein levels of genes [75]. It is therefore possible that the lack of *in hospite* symbiont response  
580 to thermal challenges found here is not evidence of ‘host buffering’, but instead that other post-  
581 transcriptional or post-translational regulation occurs more commonly in Symbiodiniaceae *in*  
582 *hospite*. Another unique aspect of Symbiodiniaceae genomes is *trans*-splicing of spliced leader  
583 sequences, which converts polycistronic mRNAs (code for multiple proteins) into monocistronic  
584 mRNAs (code for one protein) and potentially regulates gene expression [76, 77]. TagSeq cannot  
585 account for splice variation [25], preventing us from considering these differences. Additionally,  
586 lower depth of coverage of *in hospite* *B. psygmophilum* sequencing data captured here could have  
587 limited our ability to detect transcriptional responses. Finally, comparing algae in culture to algae  
588 in symbiosis inherently includes a confounding variable of nutritional status, as algae in culture  
589 exist in nutrient replete conditions [78]. Below we highlight future studies and data needed to  
590 further test the host buffering hypothesis.

591         Our work supports a scenario in which coral hosts modulate the environment of *in hospite*  
592 Symbiodiniaceae algae to buffer their responses to temperature challenges; however, additional  
593 experiments are needed to validate this hypothesis. First, replicating the temperature challenges  
594 performed here but leveraging proteomic and gene expression profiling in parallel [*e.g.*, 79] will  
595 be critical in establishing whether lack of gene expression of *in hospite* symbionts translates to a  
596 lack of proteomic response under stress. Including nutrient controls, namely *ex hospite*

597 Symbiodiniaceae in nutrient-depleted media that replicate the nutritional environment of the  
598 symbiosome, are necessary to address the confounding variable of nutritional status. Additionally,  
599 this proposed experiment should implement RNA extraction methods that prioritize obtaining and  
600 sequencing equal amounts of genetic material from host and symbiont.

601 While understanding the response of subtropical corals to thermal extremes is valuable in  
602 its own right, the facultative symbiosis, calcifying nature, and available genomic resources of *O.*  
603 *arbuscula* make it a unique model for linking results to tropical coral responses as climate change  
604 progresses [36]. If coral hosts are able to regulate the environments of their symbionts, and this  
605 regulation in turn can serve to limit stress in the holobiont and ultimately reduce coral bleaching,  
606 then this host buffering phenotype may allow for the identification of coral-algal pairings that will  
607 be more resilient under future global change conditions.

608

609

## 610 **Acknowledgements**

611 We would like to thank Steve Broadhurst for assistance collecting *Oculina arbuscula* colonies and  
612 Dr. Joel Fodrie for assistance with collection permits. The symbiont shapes used in figures were  
613 created by Giulia Puntin and modified for use ([https://github.com/sPuntinG/Coral\\_stuff](https://github.com/sPuntinG/Coral_stuff)). Thank  
614 you to Carlos Tramonte for the *Oculina arbuscula* photos used in figures, as well as Alexandra  
615 Mercurio, Olivia Aswad, Julia Russo, Justin Scace, Dr. Nicola Kriefall, Brooke Benson, Julia  
616 Mendez, and the Boston University Marine Program (BUMP) for support and assistance with the  
617 coral holobiont experiment. Thank you to the BU Shared Computing Cluster for computational  
618 resources used to complete analyses. Finally, thank you to Dr. Peter Buston, Dr. Karen Warkentin,  
619 Dr. Sean Mullen, and Dr. Carly Kenkel for their thoughtful feedback on this manuscript.

## 620 References

- 621 1. Sagan L. On the origin of mitosing cells. *J Theor Biol* 1967; **14**: 225-IN6.
- 622 2. Wernegreen JJ. Endosymbiosis. *Curr Biol* 2012; **22**: R555–R561.
- 623 3. Melo Clavijo J, Donath A, Serôdio J, Christa G. Polymorphic adaptations in metazoans to establish  
624 and maintain photosymbioses. *Biol Rev* 2018; **93**: 2006–2020.
- 625 4. Robidart JC, Bench SR, Feldman RA, Novoradovsky A, Podell SB, Gaasterland T, et al. Metabolic  
626 versatility of the *Riftia pachyptila* endosymbiont revealed through metagenomics. *Environ*  
627 *Microbiol* 2008; **10**: 727–737.
- 628 5. Burns JA, Zhang H, Hill E, Kim E, Kerney R. Transcriptome analysis illuminates the nature of the  
629 intracellular interaction in a vertebrate-algal symbiosis. *eLife* 2017; **6**: e22054.
- 630 6. Dean AD, Minter EJA, Sørensen MES, Lowe CD, Cameron DD, Brockhurst MA, et al. Host control  
631 and nutrient trading in a photosynthetic symbiosis. *J Theor Biol* 2016; **405**: 82–93.
- 632 7. LaJeunesse TC, Parkinson JE, Gabrielson PW, Jeong HJ, Reimer JD, Voolstra CR, et al. Systematic  
633 Revision of Symbiodiniaceae Highlights the Antiquity and Diversity of Coral Endosymbionts. *Curr*  
634 *Biol* 2018; **28**: 2570-2580.e6.
- 635 8. Davy SK, Allemand D, Weis VM. Cell Biology of Cnidarian-Dinoflagellate Symbiosis. *Microbiol*  
636 *Mol Biol Rev* 2012; **76**: 229–261.
- 637 9. Muscatine L. The role of symbiotic algae in carbon and energy flux in reef corals. *Ecosyst World*  
638 1990.
- 639 10. Muscatine L, R. McCloskey L, E. Marian R. Estimating the daily contribution of carbon from  
640 zooxanthellae to coral animal respiration1. *Limnol Oceanogr* 1981; **26**: 601–611.
- 641 11. Falkowski PG, Dubinsky Z, Muscatine L, McCloskey L. Population Control in Symbiotic Corals:  
642 Ammonium ions and organic materials maintain the density of zooxanthellae. *BioScience* 1993; **43**:  
643 606–611.
- 644 12. Rådecker N, Pogoreutz C, Voolstra CR, Wiedenmann J, Wild C. Nitrogen cycling in corals: the key  
645 to understanding holobiont functioning? *Trends Microbiol* 2015; **23**: 490–497.

- 646 13. Barott KL, Venn AA, Perez SO, Tambutté S, Tresguerres M. Coral host cells acidify symbiotic algal  
647 microenvironment to promote photosynthesis. *Proc Natl Acad Sci* 2015; **112**: 607–612.
- 648 14. Berkelmans R, Willis BL. Seasonal and local spatial patterns in the upper thermal limits of corals on  
649 the inshore Central Great Barrier Reef. *Coral Reefs* 1999; **18**: 219–228.
- 650 15. Baker AC, Glynn PW, Riegl B. Climate change and coral reef bleaching: An ecological assessment  
651 of long-term impacts, recovery trends and future outlook. *Estuar Coast Shelf Sci* 2008; **80**: 435–471.
- 652 16. Smale DA, Wernberg T, Oliver ECJ, Thomsen M, Harvey BP, Straub SC, et al. Marine heatwaves  
653 threaten global biodiversity and the provision of ecosystem services. *Nat Clim Change* 2019; **9**:  
654 306–312.
- 655 17. Frieler K, Meinshausen M, Golly A, Mengel M, Lebek K, Donner SD, et al. Limiting global warming  
656 to 2 °C is unlikely to save most coral reefs. *Nat Clim Change* 2013; **3**: 165–170.
- 657 18. Brown BE. Coral bleaching: causes and consequences. *Coral Reefs* 1997; **16**: S129–S138.
- 658 19. Szabó M, Larkum AWD, Vass I. A Review: The Role of Reactive Oxygen Species in Mass Coral  
659 Bleaching. In: Larkum AWD, Grossman AR, Raven JA (eds). *Photosynthesis in Algae: Biochemical and Physiological Mechanisms*. 2020. Springer International Publishing, Cham, pp  
660 459–488.
- 661
- 662 20. Berkelmans R, van Oppen MJH. The role of zooxanthellae in the thermal tolerance of corals: a  
663 ‘nugget of hope’ for coral reefs in an era of climate change. *Proc R Soc B Biol Sci* 2006; **273**: 2305–  
664 2312.
- 665 21. Stat M, Carter D, Hoegh-Guldberg O. The evolutionary history of Symbiodinium and scleractinian  
666 hosts—Symbiosis, diversity, and the effect of climate change. *Perspect Plant Ecol Evol Syst* 2006;  
667 **8**: 23–43.
- 668 22. Stat M, Gates RD. Clade D *Symbiodinium* in Scleractinian Corals: A “Nugget” of Hope, a Selfish  
669 Opportunist, an Ominous Sign, or All of the Above? *J Mar Sci* 2010; **2011**: e730715.
- 670 23. Davies SW, Marchetti A, Ries JB, Castillo KD. Thermal and pCO<sub>2</sub> Stress Elicit Divergent  
671 Transcriptomic Responses in a Resilient Coral. *Front Mar Sci* 2016; **3**.



- 672 24. DeSalvo MK, Sunagawa S, Voolstra CR, Medina M. Transcriptomic responses to heat stress and  
673 bleaching in the elkhorn coral *Acropora palmata*. *Mar Ecol Prog Ser* 2010; **402**: 97–113.
- 674 25. Meyer E, Aglyamova GV, Matz MV. Profiling gene expression responses of coral larvae (*Acropora*  
675 *millepora*) to elevated temperature and settlement inducers using a novel RNA-Seq procedure. *Mol*  
676 *Ecol* 2011; **20**: 3599–3616.
- 677 26. Dixon GB, Abbott E, Matz M. Meta-analysis of the coral environmental stress response: *Acropora*  
678 corals show opposing responses depending on stress intensity. *Mol Ecol* 2020; **29**: 2855–2870.
- 679 27. Barshis DJ, Ladner JT, Oliver TA, Palumbi SR. Lineage-Specific Transcriptional Profiles of  
680 *Symbiodinium* spp. Unaltered by Heat Stress in a Coral Host. *Mol Biol Evol* 2014; **31**: 1343–1352.
- 681 28. Baumgarten S, Bayer T, Aranda M, Liew YJ, Carr A, Micklem G, et al. Integrating microRNA and  
682 mRNA expression profiling in *Symbiodinium microadriaticum*, a dinoflagellate symbiont of reef-  
683 building corals. *BMC Genomics* 2013; **14**: 704.
- 684 29. Leggat W, Seneca F, Wasmund K, Ukani L, Yellowlees D, Ainsworth TD. Differential Responses of  
685 the Coral Host and Their Algal Symbiont to Thermal Stress. *PLOS ONE* 2011; **6**: e26687.
- 686 30. Bove CB, Ingersoll MV, Davies SW. Help Me, Symbionts, You’re My Only Hope: Approaches to  
687 Accelerate our Understanding of Coral Holobiont Interactions. *Integr Comp Biol* 2022; icac141.
- 688 31. Puntin G, Sweet M, Fraune S, Medina M, Sharp K, Weis VM, et al. Harnessing the Power of Model  
689 Organisms To Unravel Microbial Functions in the Coral Holobiont. *Microbiol Mol Biol Rev* 2022;  
690 **86**: e00053-22.
- 691 32. Lenth RV, Buerkner P, Herve M, Love J, Miguez F, Riebl H, et al. emmeans: Estimated Marginal  
692 Means, aka Least-Squares Means. 2022.
- 693 33. R Core Team. R: A language and environment for statistical computing. 2022. R Foundation for  
694 Statistical Computing, Vienna, Austria.
- 695 34. Lohman BK, Weber JN, Bolnick DI. Evaluation of TagSeq, a reliable low-cost alternative for  
696 RNAseq. *Mol Ecol Resour* 2016; **16**: 1315–1321.

- 697 35. Bove CB, Greene K, Sugierski S, Kriefall N, Huzar A, Hughes A, et al. Exposure to global change  
698 and microplastics elicits an immune response in an endangered coral. *Front Mar Sci* 2023; **9**:  
699 1037130.
- 700 36. Rivera HE, Davies SW. Symbiosis maintenance in the facultative coral, *Oculina arbuscula*, relies on  
701 nitrogen cycling, cell cycle modulation, and immunity. *Sci Rep* 2021; **11**: 21226.
- 702 37. Langmead B, Salzberg SL. Fast gapped-read alignment with Bowtie 2. *Nat Methods* 2012; **9**: 357–  
703 359.
- 704 38. Korneliussen TS, Albrechtsen A, Nielsen R. ANGSD: Analysis of Next Generation Sequencing Data.  
705 *BMC Bioinformatics* 2014; **15**: 356.
- 706 39. Love MI, Huber W, Anders S. Moderated estimation of fold change and dispersion for RNA-seq data  
707 with DESeq2. *Genome Biol* 2014; **15**: 550.
- 708 40. Oksanen J, Simpson GL, Blanchet FG, Kindt R, Legendre P, Minchin PR, et al. vegan: Community  
709 Ecology Package. 2022.
- 710 41. Lüdtke D, Ben-Shachar MS, Patil I, Waggoner P, Makowski D. performance: An R Package for  
711 Assessment, Comparison and Testing of Statistical Models. *J Open Source Softw* 2021; **6**: 3139.
- 712 42. Wright RM, Aglyamova GV, Meyer E, Matz MV. Gene expression associated with white syndromes  
713 in a reef building coral, *Acropora hyacinthus*. *BMC Genomics* 2015; **16**: 371.
- 714 43. Pochon X, Pawlowski J, Zaninetti L, Rowan R. High genetic diversity and relative specificity among  
715 Symbiodinium-like endosymbiotic dinoflagellates in soritid foraminiferans. *Mar Biol* 2001; **139**:  
716 1069–1078.
- 717 44. Stat M, Pochon X, Cowie ROM, Gates RD. Specificity in communities of Symbiodinium in corals  
718 from Johnston Atoll. *Mar Ecol Prog Ser* 2009; **386**: 83–96.
- 719 45. Hume BCC, Smith EG, Ziegler M, Warrington HJM, Burt JA, LaJeunesse TC, et al. SymPortal: A  
720 novel analytical framework and platform for coral algal symbiont next-generation sequencing ITS2  
721 profiling. *Mol Ecol Resour* 2019; **19**: 1063–1080.

- 722 46. McMurdie PJ, Holmes S. phyloseq: An R Package for Reproducible Interactive Analysis and  
723 Graphics of Microbiome Census Data. *PLOS ONE* 2013; **8**: e61217.
- 724 47. Dixon GB, Kenkel CD. Molecular convergence and positive selection associated with the evolution  
725 of symbiont transmission mode in stony corals. *Proc R Soc B Biol Sci* 2019; **286**: 20190111.
- 726 48. Haas BJ, Papanicolaou A, Yassour M, Grabherr M, Blood PD, Bowden J, et al. De novo transcript  
727 sequence reconstruction from RNA-seq using the Trinity platform for reference generation and  
728 analysis. *Nat Protoc* 2013; **8**: 1494–1512.
- 729 49. Li L, Stoeckert CJ, Roos DS. OrthoMCL: Identification of Ortholog Groups for Eukaryotic Genomes.  
730 *Genome Res* 2003; **13**: 2178–2189.
- 731 50. Katoh K, Standley DM. MAFFT Multiple Sequence Alignment Software Version 7: Improvements in  
732 Performance and Usability. *Mol Biol Evol* 2013; **30**: 772–780.
- 733 51. Price MN, Dehal PS, Arkin AP. FastTree: Computing Large Minimum Evolution Trees with Profiles  
734 instead of a Distance Matrix. *Mol Biol Evol* 2009; **26**: 1641–1650.
- 735 52. Zhang Y, Parmigiani G, Johnson WE. ComBat-seq: batch effect adjustment for RNA-seq count data.  
736 *NAR Genomics Bioinforma* 2020; **2**: lqaa078.
- 737 53. Barkan A, Small I. Pentatricopeptide Repeat Proteins in Plants. *Annu Rev Plant Biol* 2014; **65**: 415–  
738 442.
- 739 54. Wuitchik DM, Almanzar A, Benson BE, Brennan S, Chavez JD, Liesegang MB, et al. Characterizing  
740 environmental stress responses of aposymbiotic *Astrangia poculata* to divergent thermal challenges.  
741 *Mol Ecol* 2021; **30**: 5064–5079.
- 742 55. Dimond J, Carrington E. Symbiosis regulation in a facultatively symbiotic temperate coral:  
743 zooxanthellae division and expulsion. *Coral Reefs* 2008; **27**: 601–604.
- 744 56. Scheufen T, Iglesias-Prieto R, Enríquez S. Changes in the Number of Symbionts and Symbiodinium  
745 Cell Pigmentation Modulate Differentially Coral Light Absorption and Photosynthetic Performance.  
746 *Front Mar Sci* 2017; **4**.

- 747 57. McLachlan RH, Price JT, Solomon SL, Grottoli AG. Thirty years of coral heat-stress experiments: a  
748 review of methods. *Coral Reefs* 2020; **39**: 885–902.
- 749 58. Aichelman HE, Bove CB, Castillo KD, Boulton JM, Knowlton AC, Nieves OC, et al. Exposure  
750 duration modulates the response of Caribbean corals to global change stressors. *Limnol Oceanogr*  
751 2021; **66**: 3100–3115.
- 752 59. Davies SW, Ries JB, Marchetti A, Castillo KD. Symbiodinium Functional Diversity in the Coral  
753 *Siderastrea siderea* Is Influenced by Thermal Stress and Reef Environment, but Not Ocean  
754 Acidification. *Front Mar Sci* 2018; **5**.
- 755 60. Barshis DJ, Ladner JT, Oliver TA, Seneca FO, Traylor-Knowles N, Palumbi SR. Genomic basis for  
756 coral resilience to climate change. *Proc Natl Acad Sci* 2013; **110**: 1387–1392.
- 757 61. Bellantuono AJ, Dougan KE, Granados-Cifuentes C, Rodriguez-Lanetty M. Free-living and  
758 symbiotic lifestyles of a thermotolerant coral endosymbiont display profoundly distinct  
759 transcriptomes under both stable and heat stress conditions. *Mol Ecol* 2019; **28**: 5265–5281.
- 760 62. Maor-Landaw K, van Oppen MJH, McFadden GI. Symbiotic lifestyle triggers drastic changes in the  
761 gene expression of the algal endosymbiont *Breviolum minutum* (Symbiodiniaceae). *Ecol Evol* 2020;  
762 **10**: 451–466.
- 763 63. Lin S, Yu L, Zhang H. Transcriptomic Responses to Thermal Stress and Varied Phosphorus  
764 Conditions in *Fugacium kawagutii*. *Microorganisms* 2019; **7**: 96.
- 765 64. Thornhill DJ, Kemp DW, Bruns BU, Fitt WK, Schmidt GW. Correspondence Between Cold  
766 Tolerance and Temperate Biogeography in a Western Atlantic Symbiodinium (dinophyta) Lineage1.  
767 *J Phycol* 2008; **44**: 1126–1135.
- 768 65. Dileria NJ, Camp EF, Bartels N, Suggett DJ. Contrasting the thermal performance of cultured coral  
769 endosymbiont photo-physiology. *J Exp Mar Biol Ecol* 2023; **561**: 151865.
- 770 66. Takahashi S, Whitney S, Itoh S, Maruyama T, Badger M. Heat stress causes inhibition of the de novo  
771 synthesis of antenna proteins and photobleaching in cultured Symbiodinium. *Proc Natl Acad Sci*  
772 2008; **105**: 4203–4208.

- 773 67. Tchernov D, Gorbunov MY, de Vargas C, Narayan Yadav S, Milligan AJ, Häggblom M, et al.  
774 Membrane lipids of symbiotic algae are diagnostic of sensitivity to thermal bleaching in corals.  
775 *Proc Natl Acad Sci* 2004; **101**: 13531–13535.
- 776 68. Hill R, Ralph PJ. Photosystem II Heterogeneity of in hospite Zooxanthellae in Scleractinian Corals  
777 Exposed to Bleaching Conditions. *Photochem Photobiol* 2006; **82**: 1577–1585.
- 778 69. Marangoni LF de B, Rottier C, Ferrier-Pagès C. Symbiont regulation in *Stylophora pistillata* during  
779 cold stress: an acclimation mechanism against oxidative stress and severe bleaching. *J Exp Biol*  
780 2021; **224**: jeb235275.
- 781 70. Saxby T, Dennison WC, Hoegh-Guldberg O. Photosynthetic responses of the coral *Montipora*  
782 *digitata* to cold temperature stress. *Mar Ecol Prog Ser* 2003; **248**: 85–97.
- 783 71. Kemp DW, Oakley CA, Thornhill DJ, Newcomb LA, Schmidt GW, Fitt WK. Catastrophic mortality  
784 on inshore coral reefs of the Florida Keys due to severe low-temperature stress. *Glob Change Biol*  
785 2011; **17**: 3468–3477.
- 786 72. Roth MS, Goericke R, Deheyn DD. Cold induces acute stress but heat is ultimately more deleterious  
787 for the reef-building coral *Acropora yongei*. *Sci Rep* 2012; **2**: 240.
- 788 73. Lin S, Cheng S, Song B, Zhong X, Lin X, Li W, et al. The *Symbiodinium kawagutii* genome  
789 illuminates dinoflagellate gene expression and coral symbiosis. *Science* 2015; **350**: 691–694.
- 790 74. Lin S. Genomic understanding of dinoflagellates. *Res Microbiol* 2011; **162**: 551–569.
- 791 75. Aranda M, Li Y, Liew YJ, Baumgarten S, Simakov O, Wilson MC, et al. Genomes of coral  
792 dinoflagellate symbionts highlight evolutionary adaptations conducive to a symbiotic lifestyle. *Sci*  
793 *Rep* 2016; **6**: 39734.
- 794 76. Bayer T, Aranda M, Sunagawa S, Yum LK, DeSalvo MK, Lindquist E, et al. *Symbiodinium*  
795 Transcriptomes: Genome Insights into the Dinoflagellate Symbionts of Reef-Building Corals. *PLOS*  
796 *ONE* 2012; **7**: e35269.
- 797 77. Zhang H, Hou Y, Miranda L, Campbell DA, Sturm NR, Gaasterland T, et al. Spliced leader RNA  
798 trans-splicing in dinoflagellates. *Proc Natl Acad Sci* 2007; **104**: 4618–4623.

799 78. Maruyama S, Weis VM. Limitations of Using Cultured Algae to Study Cnidarian-Algal Symbioses  
800 and Suggestions for Future Studies. *J Phycol* 2021; **57**: 30–38.

801 79. Camp EF, Kahlke T, Signal B, Oakley CA, Lutz A, Davy SK, et al. Proteome metabolome and  
802 transcriptome data for three Symbiodiniaceae under ambient and heat stress conditions. *Sci Data*  
803 2022; **9**: 153.

804

## 805 **Data Accessibility and Benefit-Sharing Section**

### 806 **Data Accessibility Statement**

807 Raw sequencing data will be deposited in the SRA upon publication (BioProject ID=XX). All  
808 other data, code, and materials used in the analyses can be found on the Github repository  
809 associated with this project ([https://github.com/hannahaichelman/Oculina\\_Host\\_Sym\\_GE](https://github.com/hannahaichelman/Oculina_Host_Sym_GE)) and  
810 additionally will be hosted on Zenodo upon publication (doi: X).

811

### 812 **Funding**

813 This work was supported by Boston University start-up funds (to SWD), a National Science  
814 Foundation Graduate Research Fellowship (to HEA), the Boston University Marion Kramer  
815 Award (to HEA), and the Boston University Marine Program (SWD, HEA).

816

### 817 **Author Contributions**

818 HEA and SWD designed research; HEA, AKH, DMW, KFA, ES, NH, GD, and RMW  
819 performed research; HEA and GD analyzed data; HEA and SWD wrote the paper. All co-authors  
820 provided final feedback on the manuscript.
